# Supplementary material
Source: PubMed Central journal article supplement (PMC2744394)
Supplement: NIHMS101180-supplement-Suppl__Table_1.pdf [file NIHMS101180-supplement-Suppl__Table_1.pdf]

**Supplementary Table 1. Literature references for DNA hypermethylated genes from Figure 1.**

| <u>Gene Name</u> | <u>Tissue</u> | <u>Reference</u>                                    |
|------------------|---------------|-----------------------------------------------------|
| APC              | Breast        | Br J Cancer. 2001 Jul 6;85(1):69-73.                |
| APC              | Colon         | Int J Cancer. 1997 Mar 17;70(6):644-8.              |
| APC              | Esophageal    | Cancer Res. 2000 Sep 15;60(18):5021-6.              |
| APC              | Gastric       | Oncogene. 2000 Jul 27;19(32):3642-6.                |
| APC              | Hematopoietic | Leuk Res. 2005 Jan;29(1):47-51.                     |
| APC              | Kidney/Renal  | Cancer Res. 2001 Apr 15;61(8):3225-9.               |
| APC              | Liver         | Cancer Res. 2001 Apr 15;61(8):3225-9.               |
| APC              | Lung          | Oncogene. 2001 Jun 14;20(27):3528-32.               |
| APC              | Ovarian       | Clin Cancer Res. 2002 Nov;8(11):3324-31.            |
| APC              | Pancreatic    | Carcinogenesis. 2003 Feb;24(2):193-8.               |
| APC              | Prostate      | Clin Cancer Res. 2002 Feb;8(2):514-9.               |
| BRCA1            | Brain         | J Pathol. 2006 Mar;208(4):564-73.                   |
| BRCA1            | Breast        | Oncogene. 1996 Jun 20;12(12):2623-9.                |
| BRCA1            | Kidney/Renal  | Urology. 2003 Jan;61(1):226-30.                     |
| BRCA1            | Lung          | Cancer Res. 2001 Apr 15;61(8):3225-9.               |
| BRCA1            | Ovarian       | Catteau A, Harris WH, Xu CF, Solomon E.             |
| BRCA1            | Uterine       | Mol Cancer. 2003 May 13;2:24.                       |
| CRBP1            | Brain         | Cancer Res. 2002 Oct 15;62(20):5902-5.              |
| CRBP1            | Breast        | Cancer Res. 2002 Oct 15;62(20):5902-5.              |
| CRBP1            | Colon         | Cancer Res. 2002 Oct 15;62(20):5902-5.              |
| CRBP1            | Esophageal    | Cancer Sci. 2005 Sep;96(9):571-7.                   |
| CRBP1            | Gastric       | Cancer Res. 2002 Oct 15;62(20):5902-5.              |
| CRBP1            | Head and Neck | Cancer Res. 2002 Oct 15;62(20):5902-5.              |
| CRBP1            | Hematopoietic | Cancer Res. 2002 Oct 15;62(20):5902-5.              |
| CRBP1            | Kidney/Renal  | Cancer Res. 2002 Oct 15;62(20):5902-5.              |
| CRBP1            | Liver         | Cancer Res. 2002 Oct 15;62(20):5902-5.              |
| CRBP1            | Lung          | Cancer Res. 2002 Oct 15;62(20):5902-5.              |
| CRBP1            | Prostate      | Cancer Res. 2002 Oct 15;62(20):5902-5.              |
| Cyclin D         | Breast        | Am J Pathol. 2002 Feb;160(2):605-12.                |
| Cyclin D         | Liver         | Clin Cancer Res. 2005 May 15;11(10):3654-60.        |
| Cyclin D         | Prostate      | Clin Cancer Res. 2003 Oct 15;9(13):4730-4.          |
| DAPK             | Brain         | Int J Oncol. 2003 Mar;22(3):601-8.                  |
| DAPK             | Breast        | Cancer Res. 2001 Apr 15;61(8):3225-9.               |
| DAPK             | Colon         | Cancer Res. 2001 Apr 15;61(8):3225-9.               |
| DAPK             | Esophageal    | Int J Oncol. 2005 Jun;26(6):1493-500.               |
| DAPK             | Gastric       | Int J Mol Med. 2003 Dec;12(6):827-30.               |
| DAPK             | Head and Neck | Cancer Res. 2001 Apr 15;61(8):3225-9.               |
| DAPK             | Hematopoietic | Cancer Res. 2001 Apr 15;61(8):3225-9.               |
| DAPK             | Kidney/Renal  | Cancer Res. 2001 Apr 15;61(8):3225-9.               |
| DAPK             | Lung          | Cancer Res. 2001 Jan 1;61(1):249-55.                |
| DAPK             | Ovarian       | Cancer Res. 2001 Apr 15;61(8):3225-9.               |
| DAPK             | Prostate      | Int J Cancer. 2003 Sep 1;106(3):382-7.              |
| DAPK             | Uterine       | Clin Cancer Res. 2001 Jul;7(7):1982-6.              |
| E-cad (CDH1)     | Brain         | Int J Cancer. 2003 Aug 10;106(1):52-9.              |
| E-cad (CDH1)     | Breast        | Cancer Res. 1995 Nov 15;55(22):5195-9.              |
| E-cad (CDH1)     | Colon         | Cancer Sci. 2003 May;94(5):442-7.                   |
| E-cad (CDH1)     | Esophageal    | Cancer Res. 2001 Apr 15;61(8):3225-9.               |
| E-cad (CDH1)     | Gastric       | Proc Natl Acad Sci U S A. 1995 Aug 1;92(16):7416-9. |
| E-cad (CDH1)     | Head and Neck | Int J Oncol. 1998 Feb;12(2):293-8.                  |
| E-cad (CDH1)     | Hematopoietic | Cancer Res. 2001 Apr 15;61(8):3225-9.               |
| E-cad (CDH1)     | Kidney/Renal  | Proc Natl Acad Sci U S A. 1995 Aug 1;92(16):7416-9. |
| E-cad (CDH1)     | Liver         | Proc Natl Acad Sci U S A. 1995 Aug 1;92(16):7416-9. |
| E-cad (CDH1)     | Lung          | Proc Natl Acad Sci U S A. 1995 Aug 1;92(16):7416-9. |
| E-cad (CDH1)     | Ovarian       | Br J Cancer. 2004 Feb 23;90(4):874-81.              |
| E-cad (CDH1)     | Pancreatic    | Cancer Res. 2000 Apr 1;60(7):1835-9.                |
| E-cad (CDH1)     | Prostate      | Cancer Res. 1995 Nov 15;55(22):5195-9.              |
| E-cad (CDH1)     | Uterine       | Cancer. 2003 Feb 15;97(4):1002-9.                   |
| ER (ESR1)        | Brain         | Oncogene. 1998 Jun 18;16(24):3197-202.              |
| ER (ESR1)        | Breast        | Br J Cancer. 1990 Feb;61(2):270-5.                  |
| ER (ESR1)        | Colon         | Cancer Res. 1999 May 15;59(10):2302-6.              |
| ER (ESR1)        | Esophageal    | Cancer Res. 2000 Sep 15;60(18):5021-6.              |

|           |               |                                                     |
|-----------|---------------|-----------------------------------------------------|
| ER (ESR1) | Gastric       | Oncol Rep. 2004 Mar;11(3):617-22.                   |
| ER (ESR1) | Head and Neck |                                                     |
| ER (ESR1) | Hematopoietic | Leukemia. 1997 Mar;11 Suppl 1:S7-11.                |
| ER (ESR1) | Kidney/Renal  |                                                     |
| ER (ESR1) | Liver         | J Natl Cancer Inst. 2002 May 15;94(10):755-61.      |
| ER (ESR1) | Lung          | Cancer Res. 1996 Aug 15;56(16):3655-8.              |
| ER (ESR1) | Ovarian       | Br J Cancer. 2002 Jan 21;86(2):282-4.               |
| ER (ESR1) | Prostate      | Cancer Res. 2000 Jun 15;60(12):3175-82.             |
| FANCF     | Head and Neck | Oncogene. 2004 Jan 29;23(4):1000-4.                 |
| FANCF     | Hematopoietic | Br J Haematol. 2003 Nov;123(3):469-71.              |
| FANCF     | Lung          | Oncogene. 2004 Jan 29;23(4):1000-4.                 |
| FANCF     | Ovarian       | Nat Med. 2003 May;9(5):568-74. Epub 2003 Apr 7.     |
| FANCF     | Uterine       | Cancer Res. 2004 May 1;64(9):2994-7.                |
| FHIT      | Brain         | Hum Pathol. 2005 Dec;36(12):1265-72.                |
| FHIT      | Breast        | Cancer Res. 2001 May 1;61(9):3581-5.                |
| FHIT      | Colon         | Mod Pathol. 2005 Feb;18(2):170-8.                   |
| FHIT      | Esophageal    | Cancer Res. 1998 Aug 1;58(15):3429-34               |
| FHIT      | Gastric       | Int J Oncol. 2005 Jun;26(6):1493-500.               |
| FHIT      | Head and Neck | J Pathol. 2002 Mar;196(3):300-6.                    |
| FHIT      | Hematopoietic | Cancer Res. 2004 Mar 15;64(6):2000-6.               |
| FHIT      | Kidney/Renal  | Cancer Res. 2001 Dec 15;61(24):8659-63.             |
| FHIT      | Liver         | Liver Int. 2005 Dec;25(6):1202-8.                   |
| FHIT      | Lung          | Cancer Res. 2001 May 1;61(9):3581-5.                |
| FHIT      | Ovarian       | Mol Cancer. 2004 Dec 1;3:33.                        |
| FHIT      | Prostate      | Clin Cancer Res. 2002 Feb;8(2):514-9.               |
| FHIT      | Uterine       | Clin Cancer Res. 2001 Mar;7(3):584-9.               |
| GATA4     | Colon         | Mol Cell Biol. 2003 Dec;23(23):8429-39.             |
| GATA4     | Gastric       | Mol Cell Biol. 2003 Dec;23(23):8429-39.             |
| GATA4     | Lung          | Clin Cancer Res. 2004 Dec 1;10(23):7917-24.         |
| GATA4     | Ovarian       | Cancer Lett. 2005 Dec 6; [Epub ahead of print]      |
| GATA5     | Colon         | Mol Cell Biol. 2003 Dec;23(23):8429-39.             |
| GATA5     | Gastric       | Mol Cell Biol. 2003 Dec;23(23):8429-39.             |
| GATA5     | Lung          | Clin Cancer Res. 2004 Dec 1;10(23):7917-24.         |
| GATA5     | Ovarian       | Cancer Lett. 2005 Dec 6; [Epub ahead of print]      |
| GST-pi    | Brain         | J Cell Biochem. 2000 Apr;77(3):372-81.              |
| GST-pi    | Breast        | Cancer Res. 1998 Oct 15;58(20):4515-8.              |
| GST-pi    | Esophageal    | Cancer Res. 2001 Apr 15;61(8):3225-9.               |
| GST-pi    | Gastric       | Cancer. 2001 Jun 15;91(12):2294-301.                |
| GST-pi    | Hematopoietic | Biochem Pharmacol. 2001 Mar 1;61(5):605-12.         |
| GST-pi    | Kidney/Renal  | Cancer Res. 1998 Oct 15;58(20):4515-8.              |
| GST-pi    | Liver         | Int J Oncol. 2000 Apr;16(4):663-76.                 |
| GST-pi    | Lung          | Cancer Res. 2001 Jan 1;61(1):249-55.                |
| GST-pi    | Prostate      | Oncogene. 1999 Feb 11;18(6):1313-24.                |
| GST-pi    | Uterine       | Clin Cancer Res. 2001 Mar;7(3):584-9.               |
| HIC1      | Brain         | Nat Med. 1995 Jun;1(6):570-7.                       |
| HIC1      | Breast        | Nat Med. 1995 Jun;1(6):570-7.                       |
| HIC1      | Colon         | Nat Med. 1995 Jun;1(6):570-7.                       |
| HIC1      | Gastric       | Cancer Lett. 1998 Jan 9;122(1-2):135-41.            |
| HIC1      | Hematopoietic | Cancer Res. 1997 May 1;57(9):1678-81.               |
| HIC1      | Liver         | Hepatology. 1999 Mar;29(3):703-9                    |
| HIC1      | Lung          | Nat Med. 1995 Jun;1(6):570-7.                       |
| HIC1      | Ovarian       | Am J Pathol. 2001 Mar;158(3):1121-7.                |
| HIC1      | Uterine       | Clin Cancer Res. 2001 Jul;7(7):1982-6.              |
| MLH1      | Brain         | Oncogene. 2000 Mar 16;19(12):1564-71.               |
| MLH1      | Breast        | Oncogene. 2002 Aug 22;21(37):5696-703.              |
| MLH1      | Colon         | Cancer Res. 1997 Mar 1;57(5):808-11.                |
| MLH1      | Esophageal    | Int J Cancer. 2005 Mar 20;114(2):166-73.            |
| MLH1      | Gastric       | Cancer Res. 1999 Jan 1;59(1):159-64.                |
|           |               | Otolaryngol Head Neck Surg. 2002 May;126(5):548-53. |
| MLH1      | Head and Neck |                                                     |
| MLH1      | Hematopoietic | Cancer Res. 2001 Apr 15;61(8):3225-9.               |
| MLH1      | Liver         | Cancer Res. 2001 Apr 15;61(8):3225-9.               |
| MLH1      | Ovarian       | Oncogene. 1999 Apr 8;18(14):2335-41                 |
| MLH1      | Pancreatic    | Surgery. 2003 Dec;134(6):902-8; discussion 909.     |

|         |               |                                                    |
|---------|---------------|----------------------------------------------------|
| MLH1    | Uterine       | Oncogene. 1998 Nov 5;17(18):2413-7.                |
| O6-MGMT | Brain         | Cancer Res. 1999 Feb 15;59(4):793-7.               |
| O6-MGMT | Colon         | Cancer Res. 1999 Feb 15;59(4):793-7.               |
| O6-MGMT | Esophageal    | Cancer Res. 2001 Apr 15;61(8):3225-9.              |
| O6-MGMT | Gastric       | Cancer Res. 2001 Apr 15;61(8):3225-9.              |
| O6-MGMT | Head and Neck | Cancer Res. 1999 Feb 15;59(4):793-7.               |
| O6-MGMT | Hematopoetic  | Cancer Res. 1999 Feb 15;59(4):793-7.               |
| O6-MGMT | Kidney/Renal  | Cancer Res. 2001 Apr 15;61(8):3225-9.              |
| O6-MGMT | Liver         | Int J Cancer. 2003 Feb 10;103(4):440-4.            |
| O6-MGMT | Lung          | Cancer Res. 1999 Feb 15;59(4):793-7.               |
| O6-MGMT | Ovarian       | Br J Cancer. 2004 Feb 23;90(4):874-81.             |
| O6-MGMT | Pancreatic    | Cancer Res. 2001 Apr 15;61(8):3225-9.              |
| O6-MGMT | Prostate      | Jpn J Cancer Res. 2002 Jul;93(7):767-73.           |
| O6-MGMT | Uterine       | Clin Cancer Res. 2001 Jul;7(7):1982-6.             |
| p14     | Brain         | Cancer Res. 2001 Apr 15;61(8):3225-9.              |
| p14     | Breast        | J Pathol. 2003 Mar;199(3):289-97.                  |
| p14     | Colon         | Cancer Res. 2000 Jan 1;60(1):129-33.               |
| p14     | Esophageal    | Cancer Res. 2001 Apr 15;61(8):3225-9.              |
| p14     | Gastric       | Int J Cancer. 2000 Sep 1;87(5):654-8.              |
| p14     | Head and Neck | Cancer Res. 2001 Apr 15;61(8):3225-9.              |
| p14     | Hematopoetic  | Cancer Res. 2001 Apr 15;61(8):3225-9.              |
| p14     | Kidney/Renal  | Cancer Res. 2001 Apr 15;61(8):3225-9.              |
| p14     | Lung          | Cancer Res. 2001 Apr 15;61(8):3225-9.              |
| p14     | Ovarian       | Cancer Res. 2001 Apr 15;61(8):3225-9.              |
| p14     | Prostate      | Jpn J Cancer Res. 2002 Jul;93(7):767-73.           |
| p14     | Uterine       | Cancer Res. 2001 Apr 15;61(8):3225-9.              |
| p15     | Brain         | J Neuropathol Exp Neurol. 2001 Dec;60(12):1170-80. |
| p15     | Esophageal    | Clin Cancer Res. 1999 Oct;5(10):2704-13.           |
| p15     | Gastric       | Cancer. 2001 Jun 15;91(12):2294-301.               |
| p15     | Head and Neck | Clin Cancer Res. 2002 Jan;8(1):131-7.              |
| p15     | Hematopoetic  | Cancer Res. 1996 Feb 15;56(4):722-7.               |
| p15     | Liver         | Am J Pathol. 2003 Sep;163(3):1101-7.               |
| p15     | Lung          | Int J Oncol. 2001 Aug;19(2):277-81.                |
| p15     | Ovarian       | Clin Cancer Res. 2005 Jul 1;11(13):4968-76.        |
| p16     | Brain         | Oncogene. 1996 Oct 17;13(8):1615-9.                |
| p16     | Breast        | Cancer Res. 1996 Feb 15;56(4):722-7.               |
| p16     | Colon         | Cancer Res. 1996 Feb 15;56(4):722-7.               |
| p16     | Esophageal    | Cancer Res. 1997 Jul 1;57(13):2619-22.             |
| p16     | Gastric       | Int J Cancer. 1999 Oct 29;83(3):309-13.            |
| p16     | Head and Neck | Cancer Res. 1996 Feb 15;56(4):722-7.               |
| p16     | Hematopoetic  | Cancer Res. 1997 Mar 1;57(5):837-41.               |
| p16     | Kidney/Renal  | Cancer Res. 2001 Apr 15;61(8):3225-9.              |
| p16     | Liver         | Oncogene. 1999 Jan 21;18(3):789-95.                |
| p16     | Lung          | Oncogene. 1995 Sep 21;11(6):1211-6.                |
| p16     | Ovarian       | Int J Cancer. 1997 Apr 22;74(2):148-55.            |
| p16     | Pancreatic    | Cancer Res. 2000 Apr 1;60(7):1835-9.               |
| p16     | Prostate      | Cancer Res. 1996 Feb 15;56(4):722-7.               |
| p16     | Uterine       | Cancer Lett. 1999 Mar 1;136(2):231-5.              |
| p73     | Brain         | J Neuropathol Exp Neurol. 2001 Aug;60(8):808-16.   |
| p73     | Gastric       | J Gastrointest Surg. 2003 Dec;7(8):1004-14         |
| p73     | Hematopoetic  | Blood. 1999 Aug 1;94(3):1113-20.                   |
| p73     | Liver         | Am J Pathol. 2003 Sep;163(3):1101-7.               |
| p73     | Pancreatic    | Carcinogenesis. 2003 Feb;24(2):193-8.              |
| p73     | Uterine       | Clin Cancer Res. 2004 May 15;10(10):3309-16.       |
| RAR-b   | Breast        | Cell Growth Differ. 2002 Aug;13(8):335-41.         |
| RAR-b   | Colon         | Anticancer Drugs. 1997 Jan;8(1):56-61.             |
| RAR-b   | Esophageal    | Cancer Res. 2003 Jul 1;63(13):3724-8.              |
| RAR-b   | Gastric       | Differentiation. 2001 Aug;68(1):13-21.             |
| RAR-b   | Head and Neck | Clin Cancer Res. 2004 Mar 1;10(5):1733-42.         |
| RAR-b   | Kidney/Renal  | Cancer Res. 2004 Aug 1;64(15):5511-7.              |
| RAR-b   | Liver         | Am J Pathol. 2003 Sep;163(3):1101-7.               |
| RAR-b   | Lung          | Semin Oncol. 2001 Apr;28(2 Suppl 4):3-13.          |
| RAR-b   | Ovarian       | Br J Cancer. 2004 Feb 23;90(4):874-81.             |
| RAR-b   | Pancreatic    | Ann Surg. 2003 Sep;238(3):423-31                   |

|              |               |                                                      |
|--------------|---------------|------------------------------------------------------|
| RAR-b        | Uterine       | Cancer Lett. 2005 Feb 28;219(1):33-40.               |
| RASSF1       | Brain         | Oncogene. 2001 Nov 8;20(51):7573-7.                  |
| RASSF1       | Breast        | Cancer Res. 2001 Apr 1;61(7):3105-9.                 |
| RASSF1       | Colon         | Oncogene. 2002 May 23;21(23):3792-5.                 |
| RASSF1       | Esophageal    | Clin Cancer Res. 2003 Apr;9(4):1441-5.               |
| RASSF1       | Gastric       | Cancer Res. 2001 Oct 1;61(19):7034-8.                |
| RASSF1       | Head and Neck | Cancer Res. 2001 May 15;61(10):3877-81.              |
| RASSF1       | Hematopoetic  | Oncogene. 2004 Feb 12;23(6):1326-31.                 |
| RASSF1       | Kidney/Renal  | Proc Natl Acad Sci U S A. 2001 Jun 19;98(13):7504-9. |
| RASSF1       | Liver         | Mol Carcinog. 2002 Oct;35(2):85-92.                  |
| RASSF1       | Lung          | J Natl Cancer Inst. 2001 May 2;93(9):691-9.          |
| RASSF1       | Ovarian       | Int J Cancer. 2001 Oct 15;94(2):212-7.               |
| RASSF1       | Pancreatic    | Oncogene. 2003 Jun 12;22(24):3806-12.                |
| RASSF1       | Prostate      | Oncogene. 2002 Oct 3;21(44):6835-40.                 |
| RASSF1       | Uterine       | Int J Cancer. 2003 Jun 10;105(2):204-9.              |
| sFRP1        | Brain         | Hum Pathol. 2005 Dec;36(12):1265-72.                 |
| sFRP1        | Breast        | Oncogene. 2006 Jan 30; [Epub ahead of print]         |
| sFRP1        | Colon         | Nat Genet. 2002 Jun;31(2):141-9.                     |
| sFRP1        | Esophageal    | Int J Cancer. 2005 Sep 10;116(4):584-91.             |
| sFRP1        | Hematopoetic  | J Clin Oncol. 2005 Oct 1;23(28):7043-9.              |
| sFRP1        | Kidney/Renal  | Cancer Res. 2005 Aug 15;65(16):7081-5.               |
| sFRP1        | Lung          | Oncogene. 2005 Sep 15;24(41):6323-7.                 |
| sFRP1        | Ovarian       | Cancer Sci. 2004 Sep;95(9):741-4.                    |
| sFRP1        | Prostate      | Cancer Res. 2005 May 15;65(10):4218-27.              |
| sFRP1        | Uterine       | Cancer Res. 2005 Jun 15;65(12):5031-7.               |
| sFRP2        | Colon         | Nat Genet. 2004 Apr;36(4):417-22.                    |
| sFRP2        | Esophageal    | Int J Cancer. 2005 Sep 10;116(4):584-91.             |
| sFRP2        | Hematopoetic  | J Clin Oncol. 2005 Oct 1;23(28):7043-9.              |
| sFRP2        | Kidney/Renal  | Cancer Res. 2005 Aug 15;65(16):7081-5.               |
| sFRP4        | Colon         | Nat Genet. 2004 Apr;36(4):417-22.                    |
| sFRP4        | Esophageal    | Int J Cancer. 2005 Sep 10;116(4):584-91.             |
| sFRP4        | Hematopoetic  | J Clin Oncol. 2005 Oct 1;23(28):7043-9.              |
| sFRP4        | Kidney/Renal  | Cancer Res. 2005 Aug 15;65(16):7081-5.               |
| sFRP4        | Lung          | Cancer Res. 2005 Feb 1;65(3):743-8                   |
| sFRP5        | Colon         | Nat Genet. 2004 Apr;36(4):417-22.                    |
| sFRP5        | Esophageal    | Int J Cancer. 2005 Sep 10;116(4):584-91.             |
| sFRP5        | Hematopoetic  | J Clin Oncol. 2005 Oct 1;23(28):7043-9.              |
| sFRP5        | Kidney/Renal  | Cancer Res. 2005 Aug 15;65(16):7081-5.               |
| sFRP5        | Lung          | Cancer Res. 2005 Feb 1;65(3):743-8                   |
| SOCS1        | Gastric       | Br J Cancer. 2004 Oct 4;91(7):1335-41.               |
| SOCS1        | Head and Neck | Mol Cancer Ther. 2006 Jan;5(1):8-19.                 |
| SOCS1        | Hematopoetic  | Blood. 2003 Apr 1;101(7):2784-8.                     |
| SOCS1        | Liver         | Cancer Lett. 2002 Dec 1;186(1):59-65.                |
| SOCS1        | Pancreatic    | Jpn J Clin Oncol. 2004 Apr;34(4):191-4.              |
| THBS1        | Brain         | Int J Oncol. 2003 Mar;22(3):601-8.                   |
| THBS1        | Colon         | Lab Invest. 2004 Jul;84(7):884-93.                   |
| THBS1        | Gastric       | Cancer Res. 2001 Apr 1;61(7):2847-51.                |
| THBS1        | Hematopoetic  | Blood. 2001 May 1;97(9):2823-9.                      |
| THBS1        | Kidney/Renal  | Int J Cancer. 2006 Feb 1; [Epub ahead of print]      |
| THBS1        | Pancreatic    | Cancer Res. 2000 Apr 1;60(7):1835-9.                 |
| THBS1        | Uterine       | Gynecol Oncol. 2005 Jan;96(1):173-80.                |
| TIMP3        | Brain         | Cancer Res. 2001 Apr 15;61(8):3225-9.                |
| TIMP3        | Breast        | Cancer Res. 2001 Apr 15;61(8):3225-9.                |
| TIMP3        | Colon         | Cancer Res. 2001 Apr 15;61(8):3225-9.                |
| TIMP3        | Esophageal    | Oncogene. 2005 Jun 9;24(25):4138-48.                 |
| TIMP3        | Gastric       | Int J Cancer. 2000 Jun 1;86(5):632-5.                |
| TIMP3        | Kidney/Renal  | Cancer Res. 2001 Apr 15;61(8):3225-9.                |
| TIMP3        | Liver         | Cancer Res. 2001 Apr 15;61(8):3225-9.                |
| TIMP3        | Lung          | Cancer Res. 2001 Apr 15;61(8):3225-9.                |
| TIMP3        | Ovarian       | Clin Cancer Res. 2004 Aug 15;10(16):5537-45.         |
| TIMP3        | Pancreatic    | Cancer Res. 2000 Apr 1;60(7):1835-9.                 |
| TIMP3        | Prostate      | J Clin Oncol. 2005 Sep 20;23(27):6569-75             |
| TIMP3        | Uterine       | Gynecol Oncol. 2005 Jan;96(1):173-80.                |
| TMS1(PYCARD) | Brain         | J Natl Cancer Inst. 2004 Aug 18;96(16):1208-19.      |

|              |              |                                              |
|--------------|--------------|----------------------------------------------|
| TMS1(PYCARD) | Breast       | Cancer Res. 2000 Nov 15;60(22):6236-42.      |
| TMS1(PYCARD) | Colon        | Cancer Lett. 2003 Dec 8;202(1):101-8.        |
| TMS1(PYCARD) | Gastric      | Anticancer Res. 2002 Nov-Dec;22(6C):4163-8.  |
| TMS1(PYCARD) | Hematopoetic | Blood. 2004 Oct 15;104(8):2492-8.            |
| TMS1(PYCARD) | Lung         | Int J Cancer. 2003 Aug 20;106(2):198-204.    |
| TMS1(PYCARD) | Ovarian      | Clin Cancer Res. 2004 Aug 15;10(16):5537-45. |
| TMS1(PYCARD) | Prostate     | Prostate. 2006 Jan 19; [Epub ahead of print] |

---
