# Supplementary material
Source: PubMed Central journal article supplement (PMC2744394)
Supplement: NIHMS101180-supplement-Suppl__Table_2.pdf [file NIHMS101180-supplement-Suppl__Table_2.pdf]

**Supplementary Table 2. PCR Primers and conditions**

All primers are listed in 5' to 3' orientation

**MSP Primers**

| <u>Gene</u>       | <u>Methylated Sense Primer</u> | <u>Methylated Antisense Primer</u> | <u>Unmethylated Sense Primer</u>     | <u>Unmethylated Antisense Primer</u> | <u>Annealing Temperature</u> |
|-------------------|--------------------------------|------------------------------------|--------------------------------------|--------------------------------------|------------------------------|
| APC               | TATTGCGGAGTCCGGGTC             | TCGACGAACTCCCGACGA                 | GTGTTTTATTGGGAGTGTGGGTT              | CCAATCAACAACTCCCAACAA                | 53                           |
| BRCA1             | TCGTGGTACGGAAAAGCGC            | AAATCTCAACGAACTCACGCCG             | TTGGTTTTTGGTAAATGGAAAAGTGT           | CAAAAAATCTCAACAAACTCACACCA           | 60                           |
| CRBP1 (RBP1)      | TTGGGAATTTAGTTGCTGCTGTTTC      | AAACAACGACTACCGATACTACGCC          | GTGTTGGGAATTTAGTTGTTGTTGTTT          | ACTACAAAACAACAACACTACCAATACTACACA    | 60                           |
| Cyclin D (CCND1)  | GGAAATCGTTGGGAGTTTTGTTTTT      | GAAACCCGTAAAACGACGCCG              | GGGAATTTGGGAGTTTTGTTTTT              | AACTCTTCAAAACCATAAAACAACACA          | 60                           |
| DAP-kinase (DAPK) | GGATAGTCGGATCGAGTTAACGTC       | CCCTCCCAAAACGCCGA                  | GGAGGATAGTTGGATTGAGTTAATGTT          | CAAATCCCTCCCAACACCAA                 | 60                           |
| E-Cadherin (CDH1) | TGTAGTTACGTAATTTTATTTAGTGGCGTC | CGAATACGATCGAATCGAACC              | TGGTTGATGTTAGTATTTTATTTTATTTAGTGGTGT | ACACCAATAACAATCAAATCAAACCAA          | 60                           |
| ER (ESR1)         | ACGAGTTTAAACGTCGCGGTC          | ACCCCCAAACCGTTAAAAC                | TGTTGTTTATGAGTTAATGTTGTTGTT          | AAAAAACCCCCCAACCCATT                 | 60                           |
| FANCF             | AGTATTTGGGATTCGTTATCGTGC       | GAATAAAACCATACCGACAAAACG           | TATGTTAGTATTTGGGATTTTGTATTGTTG       | ACAAATAAAACCATACCAACCAAAACA          | 60                           |
| FHIT              | GCGGGTTTTGGGTTTTACGC           | CGACGCCGACCCCACTAAA                | GGGTGTGGGTTTTGGTTTTTATGT             | CCATAAAACAACCAACCCCACTAAA            | 60                           |
| GATA-4            | GTATGATTTGCGAGTTTTCGTTTACG     | AACTCGCGACTCGAATCCCGG              | TTTGATAGTTTTGATGTTTGTGTTTGT          | CCCAACTCACAACCTCAAATCCCA             | 60                           |
| GATA-5            | AGTTTCGTTTTAGGTTAGTTTTCCGGC    | CCAATAACAATAAACGAAACGACCG          | TGGAGTTTTTTTTAGGTTAGTTTTTGGT         | CAAAACAATAACAATAACAACAACAACA         | 60                           |
| GST-Pi            | TTCCGGGTGTAGCGGTCGTC           | GCCCCAATACTAAATCAGCACG             | GATGTTTTGGGGTGTAGTGGTTGT             | CCACCCCAATACTAAATCACAACA             | 60                           |
| HIC-1             | TCGGTTTTCCGCTTTTTGTTCTGT       | AACCGAAAACATCAACCCCTCG             | TTGGGTTGGTTTTGTGTTTTG                | CACCCCTAACACCACCCCTAAC               | 60                           |
| MLH1              | ACGTAGACGTTTTATTAGGGTCGC       | CCTCATCGTAACCTACCCGCG              | TTTTGATGATAGTTTTATTAGGGTTGT          | ACCACCTCATCATAACTACCCACA             | 60                           |
| O6-MGMT           | TTTTCGACGTTGCGTAGGTTTTCCG      | GCATCTTTCGAAAACGAAAACG             | TTTATAGAGGGTGGGGTGGATTGT             | AACTCCACACTCTTCCAAAAACAACA           | 60                           |
| p14 (CDKN2a)      | GTGTTAAAGGGCGCGGTAGC           | AAAACCCCTCACTCGCGACGA              | TTTTTGGTGTAAAGGGTGGTGTAGT            | CACAAAAACCCCTCACTCACAAACA            | 55                           |
| p15 (CDKN2b)      | GGTTTTTATTTTGTAGAGCGAGGC       | TAACCGCAAAATACGAACGCG              | GGTTGGTTTTTATTTTGTAGAGTGAGGT         | AACCACTTAACCAAAAATACAACAACA          | 60                           |
| p16 (CDKN2a)      | TTATTAGAGGGTGGGGCGGATCCG       | GACCCCGAACCGCGACCCGTAA             | TTATTAGAGGGTGGGGTGGATTGT             | CAACCCCAACCAACAACCATAA               | 60                           |
| p73 (TP73)        | GGACGTAGCGAAAATCGGGGTTT        | ACCCCGAACATCGACGTCGCG              | AGGGGATGATAGTAAATTTGGGGTTT           | ATCACAACCCCAACATCAACATCCA            | 60                           |
| RAR-b             | TGTCGAGAACGCGAGCGATT           | CGACCAATCCAACCGAAAACGA             | TTGGGATGTTGAGAATGTGAGTGATT           | CTTACTCAACCAATCCAACCAAAACA           | 60                           |
| RASSF1            | GGGTTGTTTTGTTGTTTTCGTTC        | TAACCCGATTAACCCGTACTTCG            | GGGGTTTTGTTTTGTGTTTTGTTT             | AACATAACCCCAATTAACCCATACTTCA         | 60                           |
| SFRP1             | TGTAGTTTTCGGAGTTAGTGTGCGCG     | CCTACGATCGAAAACGACGCGAACC          | GTTTTGTAGTTTTTGGAGTTAGTGTGTT         | CTCAACCTACAATCAAAAACAACAACA          | 60                           |
| SFRP2             | GGGTCGGAGTTTTTTCGGAGTTGCGC     | CCGCTCTCTTCTGCTAAATACGACTCG        | TTTTGGGTTGGAGTTTTTGGAGTTGTT          | AACCACTCTCTTCAATAACAACAACA           | 60                           |
| SFRP4             | GGGTGATGTTATCGTTTTTGTATCGAC    | CCTCCCTAACGTAACCTCGAAAACG          | GGGGGTGATGTTATTTGTTTTGATTGAT         | CACCTCCCTAACATAAATAACAACAACA         | 60                           |
| SFRP5             | AAGATTTGGCGTTGGCGGGACGTTT      | ACTCCAACCGAACCTCGCGTACG            | GTAAGATTTGGTGTGGGTGGGATGTT           | AAAACCTCAACCCAAACCTCACCATACA         | 60                           |
| SOCS-1            | TTCCGCTGATTTTTAGTTCGGTC        | CGACACAACCTACAACGACCG              | TTATGAGATTTGTGTGATTTTTAGTTGGTT       | CACTAACAACAACAACCTCACAACAACA         | 55                           |
| Thrombo (THBS1)   | TCGGACGTATAGGTAATTTTTCCG       | ATCCTCGACGACCCGCCG                 | TTTTTATTTGGATGTATAGGTAATTTTTGT       | CAACTTTAATCCTCAACAACCAACA            | 55                           |
| TIMP-3            | CGTTTTGTTATTTTTGTTTTCGGTTTT    | CCGAAAACCCCGCCTCG                  | TTTTGTTTTGTTATTTTTGTTTTGTTTTT        | CCCCAAAAACCCCACTCA                   | 60                           |
| TMS-1 (PYCARD)    | GCGGTTGTAGCGGGGTGAGC           | CGCATCAAAAATAACGTCGCG              | TTGTGGTGTGATGGGGTGAGT                | CCAACACATCAAAAATAACATCACA            | 60                           |

**Real-time RT/PCR primers**

| <u>Gene Name</u>   | <u>Forward Primer</u>    | <u>Reverse Primer</u>    | <u>Annealing Temperature</u> |
|--------------------|--------------------------|--------------------------|------------------------------|
| BRCA-1             | TTGCGGGAGGAAAATGGGTAGTTA | GTTGATCTGTGGCATGTTGGTGA  | 56                           |
| Bmi-1              | TATTGTTGTTACCTGGAGACC    | TTTGAAAAGCCCTGGAACTAA    | 49                           |
| CRBP1              | CATCCGACGCTGAGCACTTTTAG  | CACGCCCTCCTTCTACCCCTTCT  | 58                           |
| Cyclin D           | GGTGGTCTGGGGAAGTTGAAGTG  | TCGACGGTGGGTACATGGCAAACT | 59                           |
| Cyclin D           | GGTGGTCTGGGGAAGTTGAAGTG  | TCGACGGTGGGTACATGGCAAACT | 59                           |
| DAPK1              | CGCTGACCACGACGAAAAGA     | GGTGGAGCTGCTGGATGAAGAGT  | 58                           |
| E-cadherin (CDH-1) | CCGCGGCGCTCTGTAGGAA      | AGGGCTCTTTGACCACCGCTCTC  | 57                           |
| EZH2               | CCGCTGAGGATGTGGATACT     | ACAAGGCTGCCGTGGATGAT     | 55                           |
| GAPDH              | GAAGTCCGAGTCAACGGATTT    | ATGGGTGGAATCATATTGGAAC   | 52-60                        |
| GATA-4             | GGCCGCCCGACACCCCAATCT    | ATAGTGACCCGTCCTCACTCG    | 56                           |
| GATA-5             | CCTGGCGCTCTACCAACA       | GGCGCGGGCGGACGAGGAC      | 58                           |
| GST-pi             | GTTTTCCGCCCGCAGTCTTC     | CCCGTATAGGCAGGAGGCTTTGAG | 62                           |
| MGMT               | CACCATCCGTTTTCCAGCAAGAG  | ACGGGATGAGGATGGGGACAGGAT | 59                           |
| p14                | GAAAGGCCCTCGAAAAGTCC     | GGCGGTTATCTCCTCCTCCTCA   | 54                           |
| p15                | AGCCGCCCAACGACTTTATTTT   | GTTATTTCCCGTGGCTCCTCCTT  | 58                           |
| p16                | CGGGGTGCGGTAGAGGA        | GCGCTGCCATCATCAT         | 58                           |
| p73                | AGGTGCGAGGCCGGGAGAACTTTG | AGGACGGGGGCTGAGGTGACTCG  | 61                           |
| RAR-b2             | CGCCCCGGCTGGATTGG        | TCGAGGGGGAGGAAGTGGAGATG  | 58                           |
| sfmbt RT A         | AGGAGAAAAGAGCGGAAAATGTT  | GCTCGGATGTACTGCCTTCACTTA | 55                           |

|               |                         |                          |    |
|---------------|-------------------------|--------------------------|----|
| <b>sFRP1</b>  | GGCCATCTACCCGTGTCG      | GATGGCTCAGATTCAACTCGT    | 60 |
| <b>sFRP2</b>  | AAGCCTGCAAAAATAAAATGATG | TGTAATGGTCTTGCTCTGGTCT   | 53 |
| <b>sFRP4</b>  | TCTATGACCGTGCGGTGTC     | ACCGATCGGGCTTAGGGCTTTAC  | 56 |
| <b>sFRP5</b>  | ACCGCGCTCCAGTGACCA      | TCTCCTTGATGCGCATTTTGACCA | 57 |
| <b>Suz12</b>  | GAGGCGGCTTCGGGGTTTCG    | GACGTGCTCCATTTTCGGCTTCT  | 58 |
| <b>Timp-3</b> | GGCGGCAGCAGCGGCAATGAC   | TACCAGCTTCTCCACCACCTT    | 62 |

### ChIP primers

| <u>Gene Name</u> | <u>Forward Primer</u>     | <u>Reverse Primer</u>    | <u>Annealing Temperature</u> | <u>Additions</u>                 |
|------------------|---------------------------|--------------------------|------------------------------|----------------------------------|
| <b>CDH1</b>      | AACAAAAGAACTCAGCCAAGTG    | ACGCCACTGAGAGGGGGTGC     |                              | 57 10% DMSO                      |
| <b>GATA4</b>     | GGGCGGGGAGGGAGAAAGGGAAC   | GTGCGCGGCCCCCGCTACAC     |                              | 61 1.5x Q solution               |
| <b>GATA5</b>     | GAAGCCCTCGGCCCGCCCGTCTA   | CTCCCCGCGCCCGCCCTTCT     |                              | 67 1.5x Q solution               |
| <b>p15</b>       | GCTAACGACCGGCCGCTCGGCCAC  | TCCCACGCTGCTCCGGCGCACTCT |                              | 61 1.5x Q solution               |
| <b>p16</b>       | TGGCTGGTCACCAGAGGGTG      | GACCGTAACTATTCGGTGCG     |                              | 56 2x PCR enhancer, Platinum Taq |
| <b>RASSF1A</b>   | GATCACGGTCCAGCCTCTGC      | CTCGAGCCTTCACTTGGGGT     |                              | 58                               |
| <b>sFRP1</b>     | AATTTTCATGGGTTTGCAAGTATGA | TAAATAAAAGGGGAGGAGGAAAG  |                              | 52                               |
| <b>sFRP2</b>     | GCTGCTGAACGGTGGCTGGAGATT  | CAGGCATGAGTGGGAGAGGGTGTG |                              | 62                               |
| <b>sFRP5</b>     | GCTGAGGGAGTTTATGCAATGTGC  | CACCTCCAGGGCCAGGATAGTCTA |                              | 56                               |
